# Supplementary material for: The dual role of pnicogen as Lewis acid and base and the unexpected interplay between the pnicogen bond and coordination interaction in H3N⋯FH2X⋯MCN (X = P and As; M = Cu, Ag, and Au)
Source: Royal Society of Chemistry journal article supplement (doi:10.1039/c4nj02051k), 2015-01-01
Supplement: c4nj02051k1.pdf [file c4nj02051k1.pdf]

## Supporting information

### Dual role of Lewis acid and base for pnictogen and unexpected interplay between pnictogen bond and coordination interaction in $\text{H}_3\text{N}\cdots\text{FH}_2\text{X}\cdots\text{MCN}$ ( $\text{X} = \text{P}$ and $\text{As}$ ; $\text{M} = \text{Cu}$ , $\text{Ag}$ , and $\text{Au}$ )

Hongying Zhuo, Qingzhong Li\*, Wenzuo Li, Jianbo Cheng

**Table S1** Changes of bond lengths ( $\Delta r$ , Å) and frequency shifts of stretch vibrations ( $\Delta\nu$ ,  $\text{cm}^{-1}$ ) for F-X, M-C and C-N bonds in the dyads.

|                                                | $\Delta r_{\text{F-X}}$ | $\Delta r_{\text{M-C}}$ | $\Delta r_{\text{C-N}}$ | $\Delta\nu_{\text{F-X}}$ | $\Delta\nu_{\text{M-C}}$ | $\Delta\nu_{\text{C-N}}$ |
|------------------------------------------------|-------------------------|-------------------------|-------------------------|--------------------------|--------------------------|--------------------------|
| $\text{H}_3\text{N}\cdots\text{FH}_2\text{P}$  | 0.026                   | ---                     | ---                     | -69                      | ---                      | ---                      |
| $\text{H}_3\text{N}\cdots\text{FH}_2\text{As}$ | 0.033                   | ---                     | ---                     | -60                      | ---                      | ---                      |
| $\text{FH}_2\text{P}\cdots\text{CuCN}$         | -0.032                  | 0.042                   | 0.001                   | 62                       | -1                       | -3                       |
| $\text{FH}_2\text{P}\cdots\text{AgCN}$         | -0.032                  | 0.010                   | 0.001                   | 64                       | 17                       | -2                       |
| $\text{FH}_2\text{P}\cdots\text{AuCN}$         | -0.037                  | 0.095                   | 0.001                   | 73                       | -48                      | -7                       |
| $\text{FH}_2\text{As}\cdots\text{CuCN}$        | -0.030                  | 0.035                   | 0.001                   | 43                       | -1                       | -3                       |
| $\text{FH}_2\text{As}\cdots\text{AgCN}$        | -0.030                  | 0.007                   | 0.001                   | 46                       | 17                       | -2                       |
| $\text{FH}_2\text{As}\cdots\text{AuCN}$        | -0.033                  | 0.083                   | 0.001                   | 49                       | -44                      | -6                       |

**Table S2** Angles ( $\alpha$ , deg) in the triads and their differences ( $\Delta\alpha$ , deg) relative to the dyads.

|                                                                 | $\alpha_1$ | $\alpha_2$ | $\alpha_3$ | $\alpha_4$ | $\alpha_5$ | $\Delta\alpha_1$ | $\Delta\alpha_2$ |
|-----------------------------------------------------------------|------------|------------|------------|------------|------------|------------------|------------------|
| $\text{H}_3\text{N}\cdots\text{FH}_2\text{P}\cdots\text{CuCN}$  | 168.1      | 112.9      | 78.9       | 44.0       | 57.0       | 0.3              | -3.7             |
| $\text{H}_3\text{N}\cdots\text{FH}_2\text{P}\cdots\text{AgCN}$  | 168.2      | 110.8      | 80.9       | 46.6       | 52.5       | 0.1              | -4.9             |
| $\text{H}_3\text{N}\cdots\text{FH}_2\text{P}\cdots\text{AuCN}$  | 167.6      | 110.0      | 82.3       | 45.2       | 52.5       | -0.2             | -6.5             |
| $\text{H}_3\text{N}\cdots\text{FH}_2\text{As}\cdots\text{CuCN}$ | 167.7      | 110.7      | 81.6       | 44.9       | 53.5       | 2.5              | -4.2             |
| $\text{H}_3\text{N}\cdots\text{FH}_2\text{As}\cdots\text{AgCN}$ | 167.8      | 109.5      | 82.7       | 47.1       | 50.2       | 2.6              | -4.9             |
| $\text{H}_3\text{N}\cdots\text{FH}_2\text{As}\cdots\text{AuCN}$ | 167.9      | 108.6      | 83.5       | 46.4       | 50.0       | 2.7              | -6.3             |

**Table S3** Changes of bond lengths ( $\Delta r$ , Å) and frequency shifts of stretch vibrations ( $\Delta \nu$ ,  $\text{cm}^{-1}$ ) for F-X, M-C, and C-N bonds in the triads.

|                                                                 | $\Delta r_{\text{F-X}}$ | $\Delta r_{\text{M-C}}$ | $\Delta r_{\text{C-N}}$ | $\Delta \nu_{\text{F-X}}$ | $\Delta \nu_{\text{M-C}}$ | $\Delta \nu_{\text{C-N}}$ |
|-----------------------------------------------------------------|-------------------------|-------------------------|-------------------------|---------------------------|---------------------------|---------------------------|
| $\text{H}_3\text{N}\cdots\text{FH}_2\text{P}\cdots\text{CuCN}$  | -0.009                  | 0.037                   | 0.001                   | -6                        | -4                        | -8                        |
| $\text{H}_3\text{N}\cdots\text{FH}_2\text{P}\cdots\text{AgCN}$  | -0.006                  | 0.007                   | 0.001                   | -14                       | 14                        | -4                        |
| $\text{H}_3\text{N}\cdots\text{FH}_2\text{P}\cdots\text{AuCN}$  | -0.012                  | 0.090                   | 0.001                   | -4                        | -58                       | -8                        |
| $\text{H}_3\text{N}\cdots\text{FH}_2\text{As}\cdots\text{CuCN}$ | 0.003                   | 0.031                   | 0.001                   | -19                       | -4                        | -8                        |
| $\text{H}_3\text{N}\cdots\text{FH}_2\text{As}\cdots\text{AgCN}$ | 0.005                   | 0.005                   | 0.001                   | -22                       | 15                        | -4                        |
| $\text{H}_3\text{N}\cdots\text{FH}_2\text{As}\cdots\text{AuCN}$ | 0.001                   | 0.080                   | 0.001                   | -17                       | -47                       | -8                        |

**Table S4** Total interaction energy ( $\Delta E_{\text{total}}$ , kcal/mol) and interaction energy ( $\Delta E$ , kcal/mol) between two molecular pairs in the trimers.

|                                                                 | $\Delta E_{\text{total}}$ | $\Delta E_{\text{X}\cdots\text{N}}$ | $\Delta E_{\text{X}\cdots\text{M}}$ | $\Delta E_{\text{N}\cdots\text{M}}$ |
|-----------------------------------------------------------------|---------------------------|-------------------------------------|-------------------------------------|-------------------------------------|
| $\text{H}_3\text{N}\cdots\text{FH}_2\text{P}\cdots\text{CuCN}$  | -57.9                     | -2.3                                | -41.8                               | -9.6                                |
| $\text{H}_3\text{N}\cdots\text{FH}_2\text{P}\cdots\text{AgCN}$  | -50.1                     | -3.9                                | -35.1                               | -8.6                                |
| $\text{H}_3\text{N}\cdots\text{FH}_2\text{P}\cdots\text{AuCN}$  | -70.6                     | -2.9                                | -55.4                               | -8.7                                |
| $\text{H}_3\text{N}\cdots\text{FH}_2\text{As}\cdots\text{CuCN}$ | -51.4                     | -1.4                                | -35.2                               | -8.5                                |
| $\text{H}_3\text{N}\cdots\text{FH}_2\text{As}\cdots\text{AgCN}$ | -45.7                     | -6.3                                | -30.4                               | -7.7                                |
| $\text{H}_3\text{N}\cdots\text{FH}_2\text{As}\cdots\text{AuCN}$ | -63.5                     | -2.2                                | -47.8                               | -8.1                                |
